# Supplementary material for: A combined experimental and theoretical study of the thermal decomposition mechanism and kinetics of ammonium dinitramide (ADN)
Source: Royal Society of Chemistry journal article supplement (doi:10.1039/c9nj06246g), 2020-01-01
Supplement: c9nj06246g1.pdf [file c9nj06246g1.pdf]

# **A combined experimental and theoretical study of the thermal decomposition mechanism and kinetics of ammonium dinitramide (ADN)**

*Kuan Wang,<sup>\*,a</sup> Bing Xue,<sup>a</sup> Jian-Gang Chen,<sup>\*,b</sup> Zhen-Hong He,<sup>a</sup> Yueping Ji,<sup>c</sup> Bozhou Wang,<sup>c</sup>*

*Jian Lu,<sup>c</sup> Zhong-Wen Liu,<sup>b</sup> Zhao-Tie Liu,<sup>\*,a,b</sup>*

<sup>a</sup>College of Chemistry and Chemical Engineering, Shaanxi University of Science & Technology,

Xi'an, 710021, China

<sup>b</sup>Key Laboratory of Applied Surface and Colloid Chemistry (Ministry of Education), and School

of Chemistry & Chemical Engineering, Shaanxi Normal University, Xi'an, 710119, China

<sup>c</sup>State Key Laboratory of Fluorine & Nitrogen Chemicals, Xi'an Modern Chemistry Research

Institute, Xi'an, 710065, China

---

\*To whom correspondence should be addressed: K. Wang, Fax/Tel: +86-29-86168327.

E-mail: wangkuan@sust.edu.cn; J.-G. Chen, Fax/Tel: +86-29-81530803. E-mail:

jgchen@snnu.edu.cn; Z.-T. Liu, Fax/Tel: +86-29-81530802. E-mail:

ztliu@snnu.edu.cn.

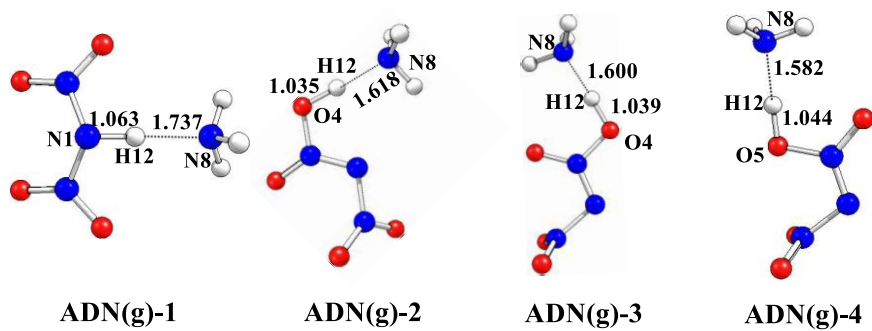

**Fig. S1** Four optimized structures of gaseous ADN.

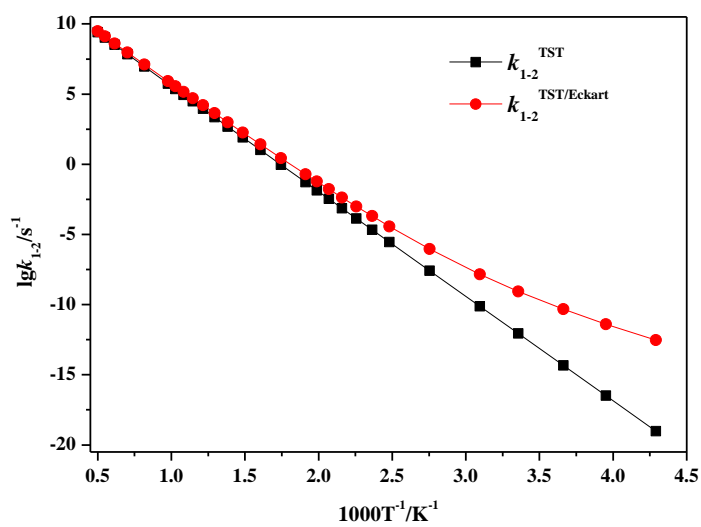

**Fig. S2** Arrhenius plots of rate coefficients ( $k^{TST}$  and  $k^{TST/Eckart}$ ) of the most favorable decomposition path D3 calculated at the B3LYP-D3 level of theory.

**Table S1** Bond dissociation energies (kcal/mol) for the NH<sub>3</sub> elimination reaction of gaseous ADN (four structures).

| Reaction                       | B3LYP-D3 <sup>a</sup> | CCSD(T)//B3LYP-D3 <sup>b</sup> | Ref.                                  |
|--------------------------------|-----------------------|--------------------------------|---------------------------------------|
| ADN(g)-1→HDN-1+NH <sub>3</sub> | 13.0                  | 12.5                           | 12.4 <sup>c</sup>                     |
| ADN(g)-2→HDN-2+NH <sub>3</sub> | 15.7                  | 13.7                           | 14.1 <sup>c</sup> , 13.9 <sup>d</sup> |
| ADN(g)-3→HDN-3+NH <sub>3</sub> | 16.2                  | 13.7                           | -                                     |
| ADN(g)-4→HDN-4+NH <sub>3</sub> | 16.5                  | 14.2                           | -                                     |

<sup>a</sup>The dissociation energies include zero-point corrections at the B3LYP-D3/6-311G(2d,p), which is denoted as B3LYP-D3; <sup>b</sup>CCSD(T)/6-311+G(3d,2p)//B3LYP-D3/6-311G(2d,p) is denoted as CCSD(T)//B3LYP-D3; <sup>c</sup>Reference 32, MP4(SDQ)/6-31+G(d,p); <sup>d</sup>Reference 41, Generalized gradient approximation (GGA) with PW91 exchange-correlation functional via the Vienna Ab-initio Simulation Package (VASP).

**Table S2** The relative energies ( $\Delta E$ , kcal/mol) of species involved in the proton transfer reactions of HDN.

| Species | B3LYP-D3 <sup>a</sup> | M062X-D3 <sup>b</sup> | CCSD(T)<br>//B3LYP-D3 <sup>c</sup> | Ref.B3LYP <sup>d</sup> | Ref.G2M <sup>e</sup> |
|---------|-----------------------|-----------------------|------------------------------------|------------------------|----------------------|
| HDN-1   | 0.0                   | 0.0                   | 0.0                                | 0.0                    | 0.0                  |
| TS1     | 33.6                  | 33.9                  | 35.6                               | 33.7                   | 34.3                 |
| HDN-2   | 7.1                   | 5.7                   | 3.9                                | 7.2                    | 4.0                  |
| TS2     | 11.6                  | 10.3                  | 7.4                                | 13.0                   | 7.7                  |
| HDN-3   | 6.4                   | 4.8                   | 3.1                                | 6.8                    | 3.1                  |
| TS3     | 34.5                  | 33.1                  | 33.4                               | 39.0                   | 32.3                 |
| HDN-4   | 7.5                   | 7.0                   | 5.2                                | 9.1                    | 5.4                  |
| TS4     | 12.6                  | 11.6                  | 9.5                                | -                      | -                    |
| HDN-5   | 3.6                   | 2.1                   | 4.5                                | -                      | -                    |

<sup>a</sup>The relative energies ( $\Delta E$ ) include zero-point corrections at the B3LYP-D3/6-311G(2d,p), which is denoted as B3LYP-D3; <sup>b</sup>M062X-D3/6-311G(2d,p) is denoted as B3LYP-D3; <sup>c</sup>CCSD(T)/6-311+G(3d,2p)//B3LYP-D3/6-311G(2d,p) is denoted as CCSD(T)//B3LYP-D3; <sup>d</sup>Reference 33, B3LYP/6-311G(d,p); <sup>e</sup>Reference 33, G2M(RCC,MP2).

**Table S3** Relative Energies ( $\Delta E$ ), Enthalpies ( $\Delta H$ ), and Gibbs free energies ( $\Delta G$ ) of all the species for the initial decomposition pathways of HDN. ( $\Delta H$  and  $\Delta G$  Values are given at 1.0 atm and 298.15 K).

| Species                              | $\Delta H$ (kcal/mol) <sup>a</sup> | $\Delta E$ (kcal/mol) <sup>b</sup> | $\Delta G$ (kcal/mol) <sup>b</sup> |
|--------------------------------------|------------------------------------|------------------------------------|------------------------------------|
| HDN-1                                | 0.0                                | 0.0                                | 0.0                                |
| A1-TS1                               | 73.5                               | 69.4                               | 69.7                               |
| A1-IM1                               | 7.3                                | 3.0                                | 3.0                                |
| 7+NO                                 | 18.0                               | 15.5                               | 4.8                                |
| A2-TS1                               | 31.9                               | 36.4                               | 37.3                               |
| A2-IM1                               | 17.8                               | 17.4                               | 17.2                               |
| 6+NO                                 | 39.1                               | 41.0                               | 4.8                                |
| HDN-2                                | 0.0                                | 0.0                                | 0.0                                |
| B1-TS1                               | 69.5                               | 62.2                               | 62.7                               |
| B1-IM1                               | 16.4                               | 6.1                                | 6.3                                |
| NOOH+2NO                             | -2.7                               | -16.2                              | -36.5                              |
| B2-TS1                               | 34.9                               | 38.6                               | 39.5                               |
| B2-IM2                               | 17.3                               | 17.7                               | 19.1                               |
| NO <sub>3</sub> +N <sub>2</sub> +OH  | -2.8                               | -13.1                              | -31.8                              |
| B3-TS1                               | 44.4                               | 41.5                               | 41.5                               |
| B3-IM1                               | -0.7                               | 2.0                                | 2.4                                |
| NO <sub>2</sub> +N <sub>2</sub> O+OH | 5.6                                | -0.9                               | -20.1                              |
| HDN-3                                | 0.0                                | 0.0                                | 0.0                                |
| C1-TS1                               | 57.5                               | 42.3                               | 41.7                               |
| C1-IM1                               | 9.4                                | 7.8                                | 7.5                                |
| NOOH+2NO                             | -2.1                               | -15.5                              | -36.1                              |
| C2-TS1                               | 44.6                               | 38.9                               | 39.4                               |
| C2-IM1                               | 19.1                               | 12.2                               | 10.9                               |
| NO <sub>3</sub> +N <sub>2</sub> +OH  | -2.1                               | -12.4                              | -31.4                              |
| HDN-4                                | 0.0                                | 0.0                                | 0.0                                |
| D1-TS1                               | 55.8                               | 40.3                               | 39.6                               |
| D1-IM1                               | 6.4                                | 3.5                                | 3.1                                |
| NOOH+2NO                             | -3.7                               | -17.6                              | -38.3                              |
| D2-TS1                               | 50.1                               | 50.6                               | 51.4                               |
| HNO <sub>3</sub> +N <sub>2</sub> O   | -43.4                              | -45.0                              | -55.1                              |
| D3-TS1                               | 29.1                               | 33.3                               | 33.5                               |
| HNO <sub>3</sub> +N <sub>2</sub> O   | -43.4                              | -45.0                              | -55.1                              |
| HDN-5                                | 0.0                                | 0.0                                | 0.0                                |
| E1-TS1                               | 61.0                               | 42.3                               | 41.0                               |
| E1-IM1                               | 12.4                               | 5.6                                | 4.4                                |
| NOOH+2NO                             | 1.2                                | -16.8                              | -38.1                              |
| E2-TS2                               | 55.2                               | 51.4                               | 51.5                               |
| HNO <sub>3</sub> +N <sub>2</sub> O   | -38.6                              | -44.2                              | -54.9                              |

<sup>a</sup> Calculated by B3LYP-D3/6-311G(2d,p); <sup>b</sup> Calculated by CCSD(T)/6-311+G(3d,2p)//B3LYP-D3/6-311G(2d,p).

**Table S4** The theoretical rate coefficients expression of the corresponding molecular and radical reaction from the NIST Chemical Kinetics Database.<sup>a</sup>

| No. | Reaction                                                            | $A$                   | $n$   | $E_a$ | order |
|-----|---------------------------------------------------------------------|-----------------------|-------|-------|-------|
| 1   | $\text{NOOH} \rightarrow \text{NO} + \text{OH}$                     | $1.09 \times 10^{16}$ | -1.23 | 208   | 1     |
| 2   | $\text{H} + \text{NO} \rightarrow \text{HNO}$                       | $1.47 \times 10^{14}$ | -0.41 | 0     | 2     |
| 3   | $\text{HNO} + \text{OH} \rightarrow \text{H}_2\text{O} + \text{NO}$ | $4.82 \times 10^{13}$ | 0     | 4.16  | 2     |
| 4   | $\text{HNO} + \text{NO}_2 \rightarrow \text{NOOH} + \text{NO}$      | $6.02 \times 10^{11}$ | 0     | 8.31  | 2     |
| 5   | $\text{H} + \text{NO}_2 \rightarrow \text{OH} + \text{NO}$          | $1.32 \times 10^{14}$ | 0     | 1.51  | 2     |
| 6   | $\text{H} + \text{OH} \rightarrow \text{H}_2\text{O}$               | $2.09 \times 10^{17}$ | 0     | 0     | 3     |

<sup>a</sup>The units of rate constants are  $\text{s}^{-1}$  for first-order reactions,  $\text{m}^3 \cdot \text{mol}^{-1} \cdot \text{s}^{-1}$  for second-order reactions, and  $\text{m}^6 \cdot \text{mol}^{-2} \cdot \text{s}^{-1}$  for second-order reactions.  $E_a$  is in kJ/mol.
